# Supplementary material for: A ratiometric green-to-blue emitting Hg 2+ ion-responsive ionic liquid-based micro-optode
Source: Royal Society of Chemistry journal article supplement (doi:10.1039/d5an00518c), 2025-01-01
Supplement: d5an00518c1.pdf [file d5an00518c1.pdf]

*Supporting information for*

**A Ratiometric Green to Blue Emitting Hg<sup>2+</sup> Ions Responsive Ionic Liquids-based Micro-optode**

Shubham Lama, Sabbir Ahamed, Shraddha Rai, Upika Darnal, Subekchha Pradhan, Najmin Tohora, and Sudhir Kumar Das\*

Department of Chemistry, University of North Bengal, Raja Rammohunpur, Darjeeling,  
West Bengal-734013, India

\*Corresponding author (Dr. S. K. Das, E-mail: sudhirkumardas@nbu.ac.in)

**Table of Contents**

| <b>Sl. No.</b>    | <b>Descriptions</b>                                                                                                                                                                                                                                                                                                                                                                      | <b>Page No.</b> |
|-------------------|------------------------------------------------------------------------------------------------------------------------------------------------------------------------------------------------------------------------------------------------------------------------------------------------------------------------------------------------------------------------------------------|-----------------|
| <b>Scheme. S1</b> | Synthetic procedure of <b>HPTIL</b> .                                                                                                                                                                                                                                                                                                                                                    | <b>3</b>        |
| <b>Fig. S1</b>    | <sup>1</sup> H NMR spectrum (CDCl <sub>3</sub> , 400 MHz) of <b>HPTIL</b> .                                                                                                                                                                                                                                                                                                              | <b>3</b>        |
| <b>Fig. S2</b>    | LC-MS spectra of <b>HPTIL</b> (a) positive ion mode and (b) negative ion mode.                                                                                                                                                                                                                                                                                                           | <b>4-5</b>      |
| <b>Fig. S3</b>    | FTIR spectra of TTPCl - IL, HPTS, and <b>HPTIL</b> .                                                                                                                                                                                                                                                                                                                                     | <b>5</b>        |
| <b>Fig. S4</b>    | The relative frequency vs. zeta potential distribution curve for the determination of the zeta potential of <b>mHPTIL</b> .                                                                                                                                                                                                                                                              | <b>6</b>        |
| <b>Fig. S5</b>    | (a) UV-visible absorption spectra of optode <b>HPTIL</b> in different percentages of water. (b) UV-visible absorption spectra with normalized absorbance of optode <b>HPTIL</b> in different percentages of water demonstrating the distinct 4 nm red shift with an increase in Mie scattering. (c) Fluorescence spectra of <b>HPTIL</b> in water-DMSO mixed solvents demonstrating ACQ. | <b>6</b>        |
| <b>Fig. S6</b>    | Time-dependent stability of <b>mHPTIL</b> under continuous UV exposure.                                                                                                                                                                                                                                                                                                                  | <b>7</b>        |
| <b>Table. S1</b>  | Calculated ΔG values in various temperatures.                                                                                                                                                                                                                                                                                                                                            | <b>7</b>        |
| <b>Fig. S7</b>    | Kinetics plot of <b>mHPTIL</b> towards Hg <sup>2+</sup> showing pseudo-first-order kinetics                                                                                                                                                                                                                                                                                              | <b>8</b>        |
| <b>Fig. S8</b>    | The impact of pH on photoluminosity of <b>mHPTIL</b> with and without Hg <sup>2+</sup> ions at 25°C.                                                                                                                                                                                                                                                                                     | <b>8</b>        |
| <b>Fig. S9</b>    | Distinctions in photoluminescence intensity were detected in urine, urine mixed with <b>mHPTIL</b> , and urine mixed with <b>mHPTIL</b> and Hg <sup>2+</sup> ions.                                                                                                                                                                                                                       | <b>9</b>        |
| <b>Table S2</b>   | Comparison with the detection limits of sensing Hg <sup>2+</sup> ions by various sensors.                                                                                                                                                                                                                                                                                                | <b>9</b>        |

## Experimental section

### General methods and instrumentation

Chemical reagents were procured from Sigma-Aldrich, India, and applied without any further purification. Anhydrous solvents and HPLC-grade solvents for spectroscopy were obtained from Merck, India. We have purchased all of the cationic and anionic salts from Sigma-Aldrich in India, including trihexyltetradecylphosphonium chloride ([TTP]Cl), 8-hydroxy pyranine-1, and 3-trisulfonic acid trisodium salt [HPTS]. Also, Deuterated chloroform ( $\text{CDCl}_3$ ) was purchased from Sigma Aldrich, India, and employed for NMR spectroscopic analysis. Fourier transform infrared (FT-IR) spectra were recorded using a Bruker Optik GMBH (Germany) FT-IR spectrometer under ambient conditions. Mass spectrometric analysis was performed on a Quattro Micro API (MICROMASS, UK) coupled with an LC-WATERS 2695 system equipped with a PDA2998 detector ESI\_Negative with capillary voltage 3 kV, Cone -30 V and extractor-3 V employing source and dissolving temperature  $-90^\circ\text{C}$  and  $-250^\circ\text{C}$  respectively using dissolving gas-450 Litre/hour with flow rate-10  $\mu\text{L}/\text{min}$ . We used a HITACHI U-2910 spectrophotometer for monitoring UV-visible absorption spectra, while fluorescence measurements were performed on a HITACHI F-7100 fluorimeter, employing a 5 nm slit width for both excitation and emission. During steady-state emission studies, the excitation wavelength was set at 330 nm, and emission was monitored over the range of 330–640 nm, respectively. The size and shape of the **mHPTIL** are estimated by field emission scanning electron microscopy (SEM) (ZEISS) employing an operating voltage of 50 kV by drop casting the required amounts of **mHPTIL** (20  $\mu\text{g}/\text{mL}$ ) on the carbon-coated copper grids. The average particle size is determined by considering the size of more than 100 particles. The hydrodynamic radius of **mHPTIL** is measured employing the dynamic light scattering (DLS) technique (Anton Paar Litesizer 500). The zeta potential ( $\zeta$ ) of nanoparticles is also obtained by this instrument using a capillary  $\zeta$ -cell.

Before the analysis, the stock solution of **HPTIL** was prepared instantly ( $1 \times 10^{-3}$  M in DMSO). The solution of numerous inorganic metal salts like  $\text{AlCl}_3$ ,  $\text{BaCl}_2$ ,  $\text{CaCl}_2$ ,  $\text{CdCl}_2$ ,  $\text{CoCl}_2$ ,  $\text{CuCl}_2$ ,  $\text{ZnCl}_2$ ,  $\text{FeCl}_3$ ,  $\text{HgCl}_2$ ,  $\text{MgCl}_2$ ,  $\text{MnCl}_2$ ,  $\text{NiCl}_2$ ,  $\text{PbCl}_2$ , and  $\text{FeCl}_2$  including all the inorganic and organic anion salt like  $\text{AlPO}_4$ ,  $\text{K}_2\text{CO}_3$ ,  $\text{KBr}$ ,  $\text{KCl}$ ,  $\text{NaF}$ ,  $\text{NaBPh}_4$ ,  $\text{Na}_2\text{HPO}_4$ ,  $\text{NaH}_2\text{PO}_4$ ,  $\text{Na}_3\text{PO}_4$ ,  $\text{KPF}_6$ ,  $\text{S}^{2-}$  and  $\text{Na}_2\text{SO}_4$  were prepared instantly in ( $1 \times 10^{-3}$  M) concentration in water.

For the fabrication of a paper-based test kit, Whatman-41 filter paper is cut into strips, which are fully immersed in **mHPTIL** aqueous solution (29  $\mu\text{M}$ ) for a while. Finally, the test strips are removed and dried in a hot air oven at 60  $^\circ\text{C}$ . Some drops of all the metal ions solution ( $10^{-3}$  M) are added to these filter papers.

### Synthesis and characterization of HPTIL

We have used an optimized ion-exchange methodology to prepare **HPTIL** as a room-temperature ionic liquid (RTIL) in quantitative yield, developed by Bakers and colleagues<sup>1</sup> with some modifications. (**Scheme S1**). In a 1:3 ratio, 8-hydroxy pyranine-1, 3, 6-trisulfonic acid trisodium salt [HPTS], and trihexyltetradecylphosphonium chloride ([TTP]Cl) are mixed in a mixture of dichloromethane (DCM)-Water of 2/1 (v/v) ratio with overnight stirring. A bluish fluorescence is seen under the 365 nm UV lamp with a distinct color change from colorless to yellowish in the necked eye. Successful ion exchange is indicated when the water layer (upper layer) becomes colorless. The DCM layer is washed with water several times to remove the byproduct, NaCl, thoroughly. The aqueous layer is further tested with  $\text{AgNO}_3$  solution to ensure the complete removal of NaCl and continues until no white precipitate due to the formation of AgCl has appeared. The upper water layer is removed, and to ensure the complete removal of water from DCM, anhydrous  $\text{Na}_2\text{SO}_4$  is added to absorb the trace amount of water. By evaporating the DCM layer and the remaining water, **HPTILs** are

obtained under a vacuum (**Scheme S1**). The as-prepared ILs, **HPTIL**, are fully characterized by NMR, FTIR, and LC-MS analysis.

### Synthesis and characterization of mHPTIL

The nano-GUMBOS **mHPTIL** has been fabricated using the reprecipitation method, and with the help of various analytical techniques, it has been characterized. A stock solution of **HPTIL** (1 mg/mL) was prepared in dimethyl sulfoxide (DMSO) by dissolving the appropriate amount of **HPTIL** in the solvent. Aqueous suspended nanoparticles were formed by quickly injecting 60  $\mu$ L of the **HPTIL** solution into water, followed by sonication for approximately 30 minutes. The formation of nanoparticles, **mHPTIL**, is confirmed by SEM, DLS, UV–visible absorption, and emission spectral analysis.

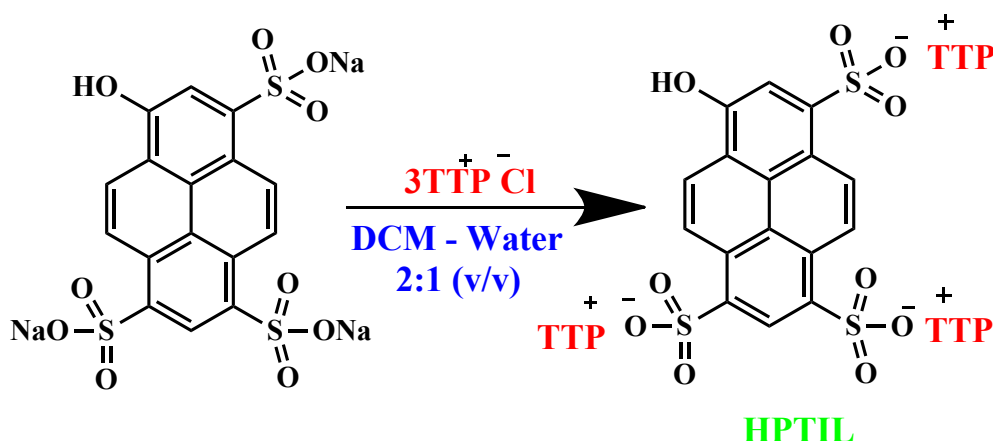

**Scheme S1.** Synthetic procedure of **HPTIL**.

**Characterization:** ( $^1\text{H}$  NMR,  $\text{CDCl}_3$ , 400 MHz, in ppm units): 10.02 (s, 1H), 9.30 (s, 1H), 9.29 (s, 1H), 9.26 (s, 1H), 9.19 (d, 1H), 8.83 (s, 1H), 8.50 (d, 1H), 1.9 - 0.8 (various m, 204H) (**Fig. S1**).

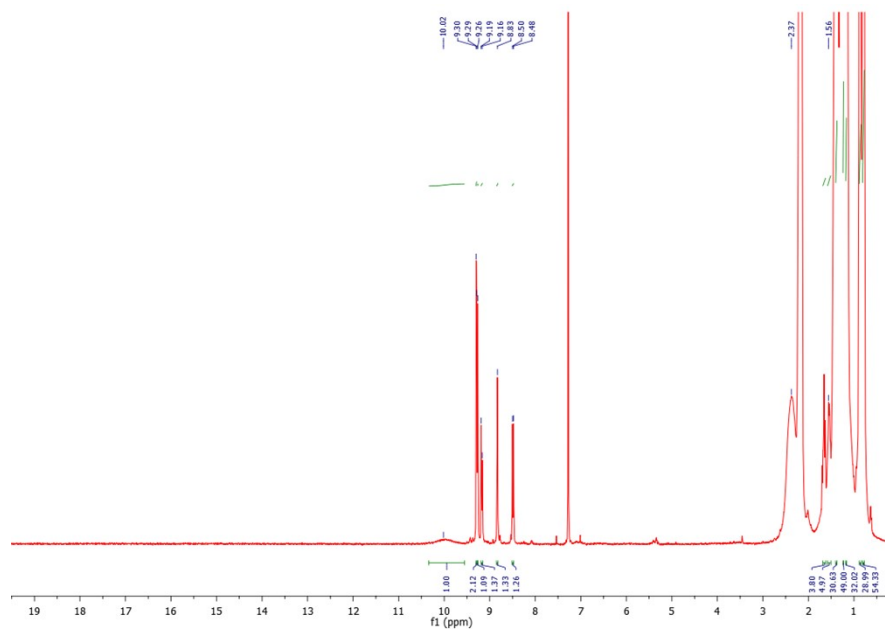

**Fig. S1**  $^1\text{H}$  NMR spectrum ( $\text{CDCl}_3$ , 400 MHz) of **HPTIL**.

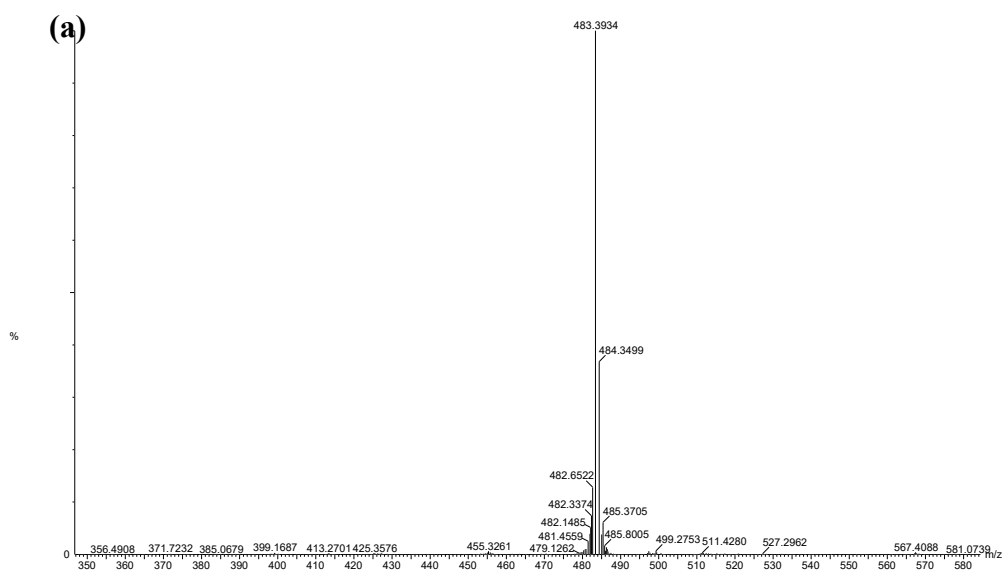

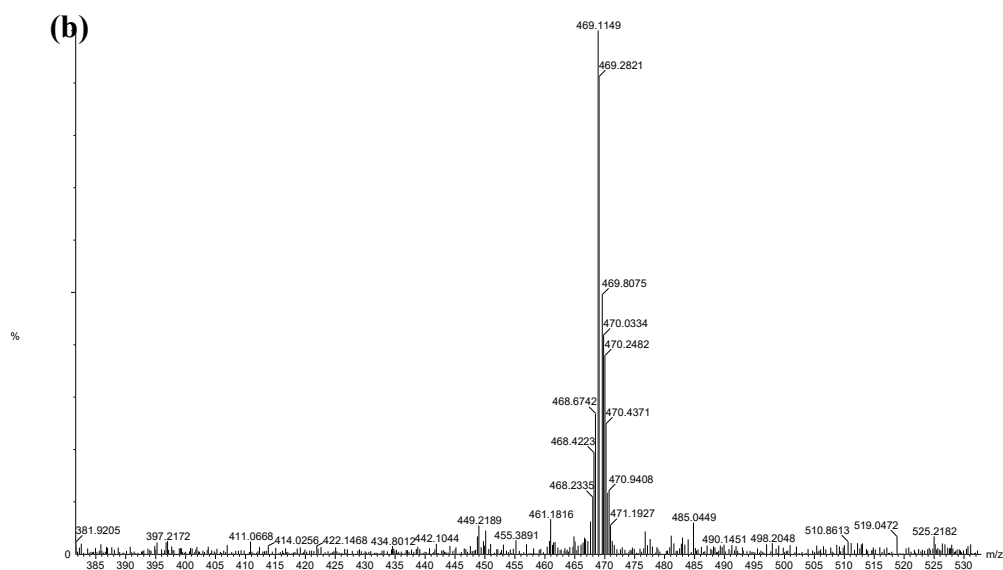

**Fig. S2** LC-MS spectra of **HPTIL** (a) positive ion mode and (b) negative ion mode.

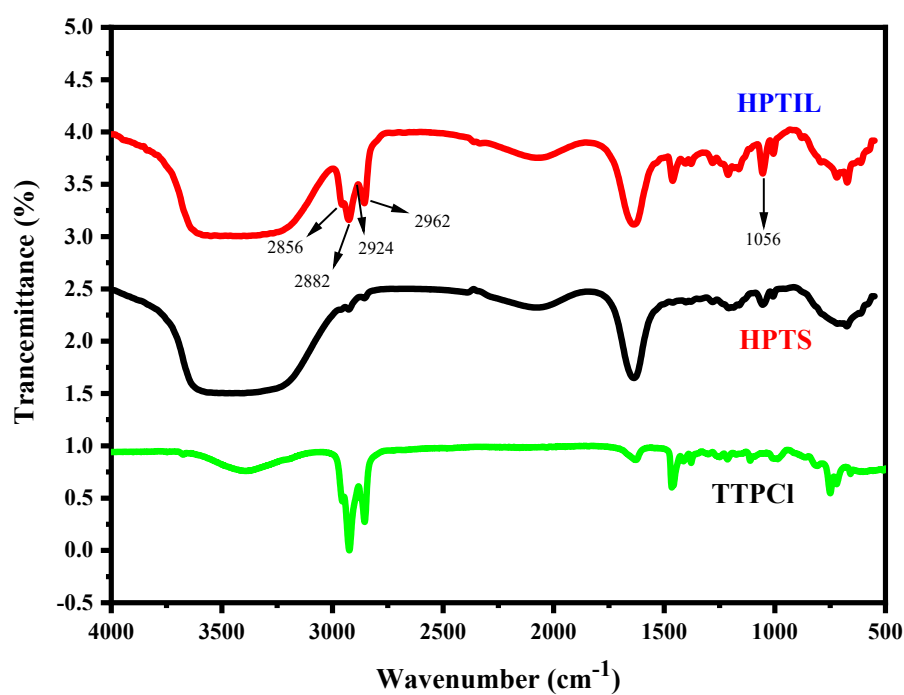

**Fig. S3** FTIR spectra of TTPCl - IL, HPTS, and **HPTIL**.

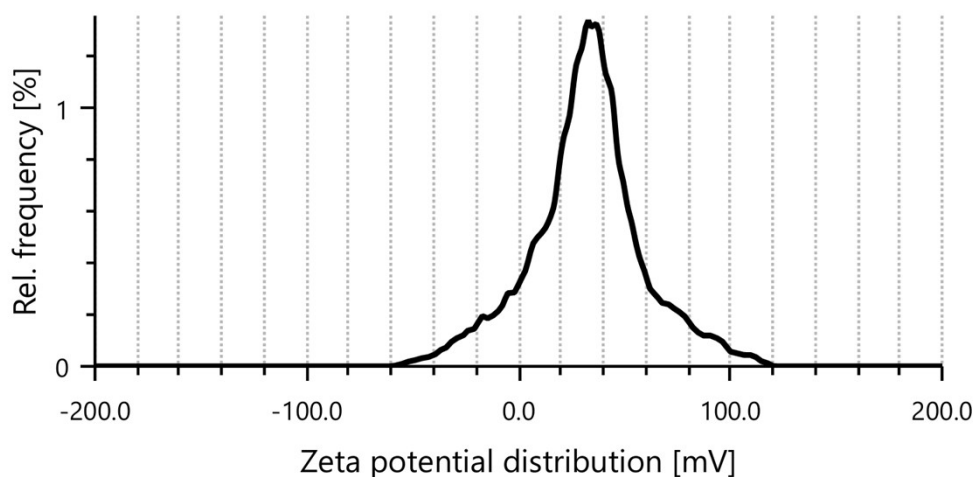

**Fig. S4** The relative frequency vs. zeta potential distribution curve for the determination of the zeta potential of **mHPTIL**.

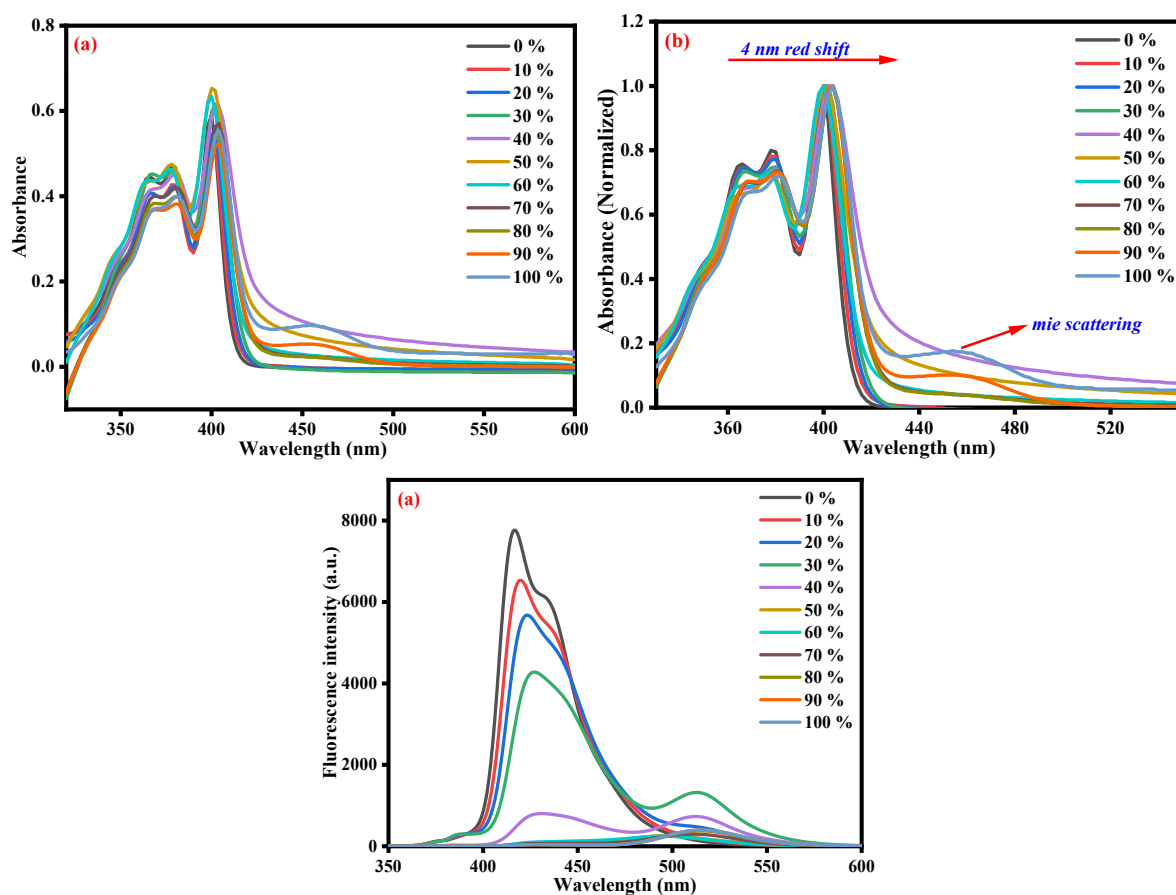

**Fig. S5** (a) UV-visible absorption spectra of optode **HPTIL** in different percentages of water. (b) UV-vis absorption spectra with normalized absorbance of optode **HPTIL** in different percentages of water demonstrating the distinct 4 nm red shift with an increase in Mie

scattering. (c) Fluorescence spectra of **HPTIL** in water-DMSO mixed solvents demonstrating ACQ.

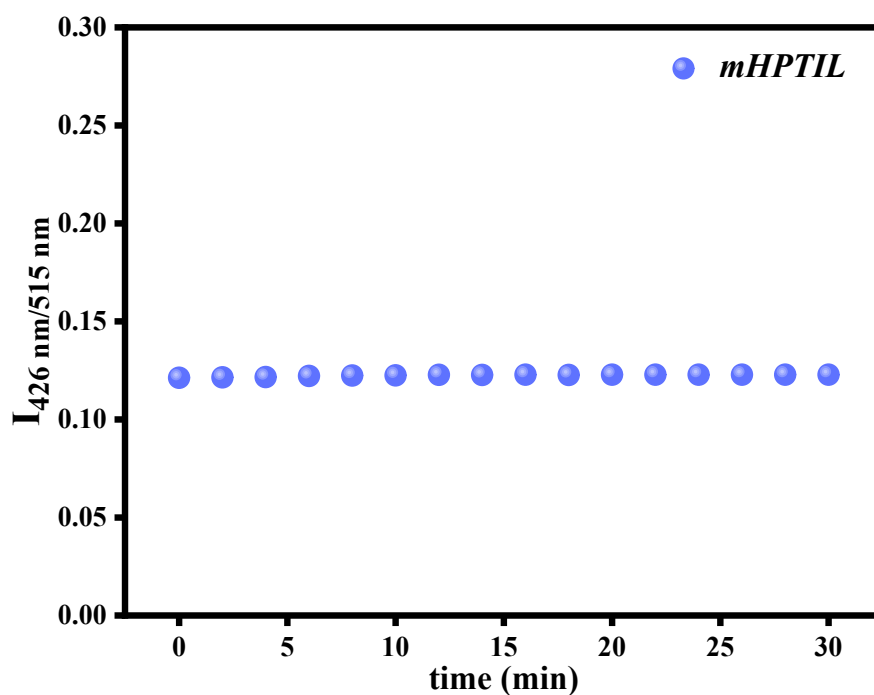

**Fig. S6** Time-dependent stability of **mHPTIL** under continuous UV exposure.

**Table. S1** Calculated  $\Delta G$  values in various temperatures.

| Temperature(°C) | $\Delta G$ (J mol <sup>-1</sup> ) | $\Delta H$ (J mol <sup>-1</sup> ) | $\Delta S$ (J mol <sup>-1</sup> K <sup>-1</sup> ) |
|-----------------|-----------------------------------|-----------------------------------|---------------------------------------------------|
| 15              | -24728.52686                      | -23440.58                         | 85.86                                             |
| 25              | -25587.15626                      |                                   |                                                   |
| 35              | -26445.78567                      |                                   |                                                   |
| 45              | -27304.41507                      |                                   |                                                   |
| 55              | -28163.04448                      |                                   |                                                   |
| 65              | -29021.67388                      |                                   |                                                   |



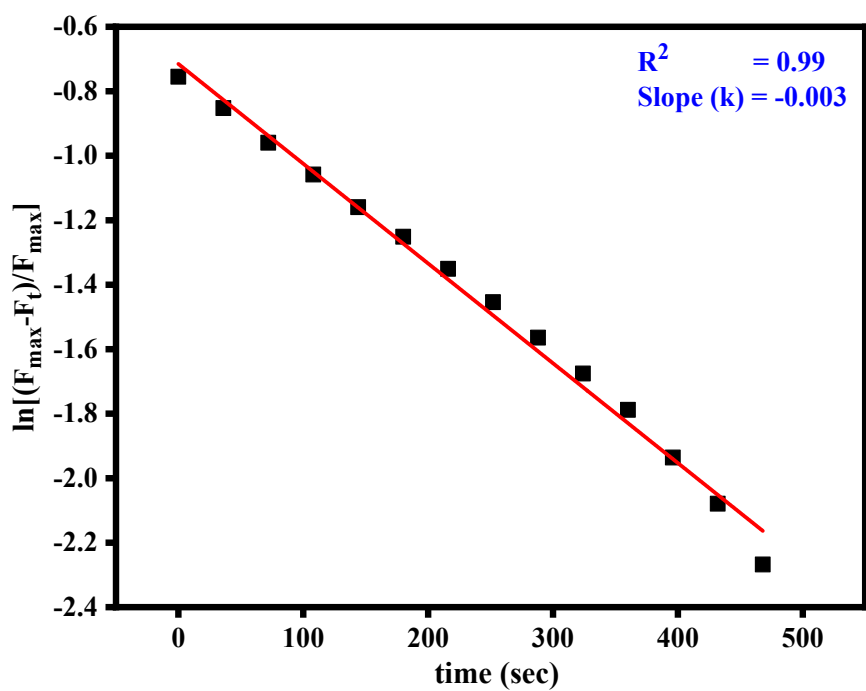

**Fig. S7** Kinetics plot of **mHPTIL** towards  $\text{Hg}^{2+}$  showing pseudo-first-order kinetics

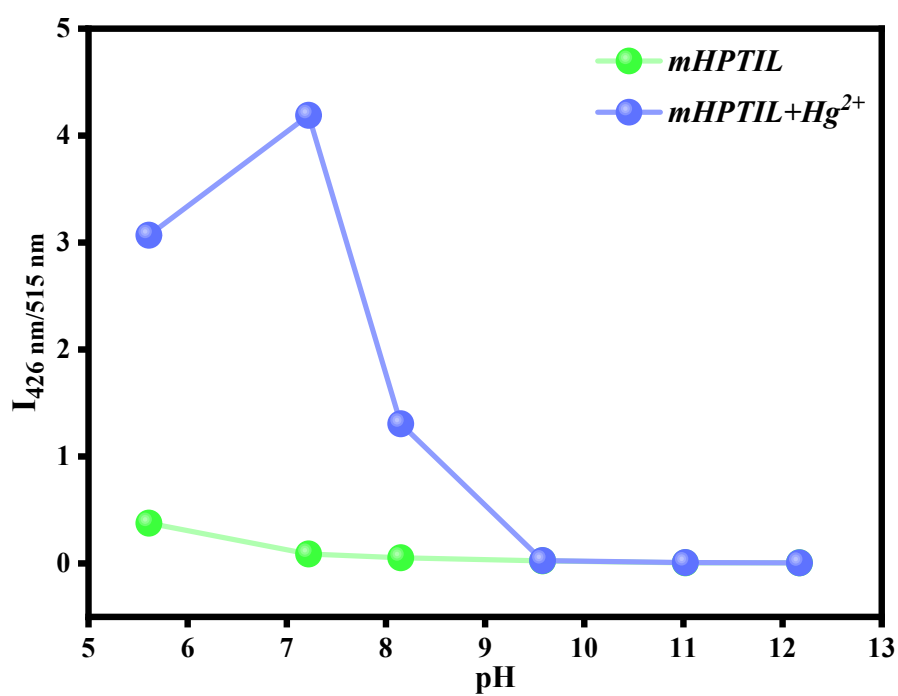

**Fig. S8** The impact of pH on photoluminescence of **mHPTIL** with and without  $\text{Hg}^{2+}$  ions at 25 °C.

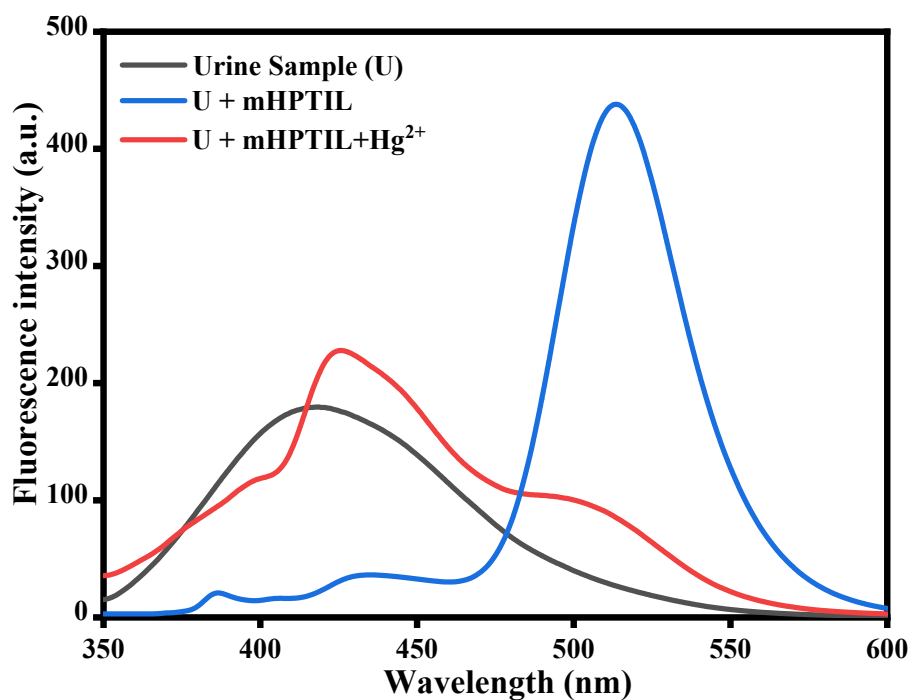

**Fig. S9** Distinctions in photoluminescence intensity detected in urine, urine mixed with mHPTIL, and urine mixed with mHPTIL and  $\text{Hg}^{2+}$  ions.

**Table. S2** Comparison with the detection limits of sensing  $\text{Hg}^{2+}$  ions by various sensors

| Sl. No | Sensor                                                                              | Solvent                          | Sensor type | LOD             | LOQ                | Portability & cost-effective | Application                               | Ref.         |
|--------|-------------------------------------------------------------------------------------|----------------------------------|-------------|-----------------|--------------------|------------------------------|-------------------------------------------|--------------|
| 1      | 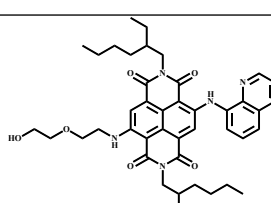 | Acetone medium                   | Turn-on     | 3 $\mu\text{M}$ | 10 $\mu\text{M}$   | YES                          | NA                                        | <sup>2</sup> |
| 2      |  | ACN                              | Turn-on     | 16 nM           | 53.3 nM            | NA                           | Metal ion sensor and real sample analysis | <sup>3</sup> |
| 3      |  | dioxane-water (1:3, v/v) solvent | Turn-off    | 5 $\mu\text{M}$ | 16.6 $\mu\text{M}$ | NA                           | Metal ion sensor                          | <sup>4</sup> |

|    |                                                                                     |                                                                                                    |              |            |             |     |                                                   |    |
|----|-------------------------------------------------------------------------------------|----------------------------------------------------------------------------------------------------|--------------|------------|-------------|-----|---------------------------------------------------|----|
| 4  | 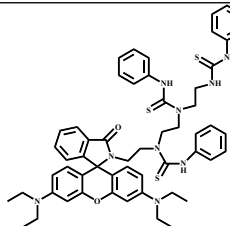   | MeCN–<br>HEPES<br>(9 : 1,<br>v/v)<br>medium                                                        | Turn-<br>on  | 30<br>μM   | 100<br>μM   | NA  | Water<br>sample<br>analysis                       | 5  |
| 5  |    | 1:1<br>(v/v)<br>acetonit<br>rile/HE<br>PES<br>Buffer<br>(10mM<br>, pH<br>7.4)                      | Turn-<br>on  | 2 μM       | 6.66<br>μM  | NA  | Water<br>sample                                   | 6  |
| 6  |    | THF                                                                                                | Turn-<br>off | 17 nM      | 56.66<br>nM | YES | Real sample<br>analysis                           | 7  |
| 7  |   | EtOH–<br>water<br>(2 : 1,<br>v/v)                                                                  | Turn-<br>on  | 150<br>nM  | 500<br>nM   | NA  | NA                                                | 8  |
| 8  |  | aqueou<br>s<br>MeCN                                                                                | Turn-<br>off | 90 nM      | 300<br>nM   | YES | Paper-test<br>strip<br>application                | 9  |
| 9  |  | CH <sub>3</sub> CN<br>/H <sub>2</sub> O<br>(v/v =<br>3/7)<br>solution<br>s                         | Turn-<br>on  | 1.08<br>μM | 3.6<br>μM   | NA  | Bioimaging<br>in living<br>cells and<br>zebrafish | 10 |
| 10 |  | DMSO/<br>H <sub>2</sub> O<br>(v/v=9/<br>1)<br>buffere<br>d by<br>50mM<br>Tris-<br>HCl at<br>pH=7.0 | Turn-<br>off | 0.90<br>μM | 3 μM        | YES | Water<br>sample                                   | 11 |
| 11 |  | 50%<br>(1:1,<br>v/v)<br>H <sub>2</sub> O/D<br>MSO                                                  | Turn-<br>on  | 0.4<br>μM  | 1.33<br>μM  | YES | Real sample<br>analysis                           | 12 |

|    |                                                                                     |                                                                         |                  |             |             |     |                             |    |
|----|-------------------------------------------------------------------------------------|-------------------------------------------------------------------------|------------------|-------------|-------------|-----|-----------------------------|----|
| 12 | 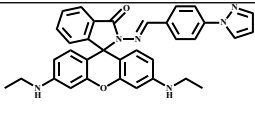   | DMSO<br>–water<br>(1 : 1,<br>v/v)                                       | Turn-<br>on      | 20.7<br>nM  | 69 nM       | YES | Water<br>sample<br>analysis | 13 |
| 13 |    | Mixture<br>of THF<br>and<br>water                                       | Turn-<br>off     | 8.0<br>ppm  | 26.6<br>ppm | YES | Paper-based<br>sensor       | 14 |
| 14 |    | MeCN/<br>H <sub>2</sub> O<br>(8:2<br>v/v)                               | Turn-<br>on      | 6.9<br>μM   | 23<br>μM    | NA  | Real-time<br>monitoring     | 15 |
| 15 |    | H <sub>2</sub> O:<br>EtOH=<br>7:1, v/v                                  | Turn-<br>off     | 22.5<br>μM  | 75<br>μM    | NA  | NA                          | 16 |
| 16 |    | Dioxan<br>e- H <sub>2</sub> O<br>(9:1,<br>v/v)                          | Turn-<br>off     | 30<br>μM    | 100<br>μM   | NA  | NA                          | 17 |
| 17 |   | Acetate<br>buffer<br>aqueou<br>s 10%<br>DMSO                            | Turn-<br>off     | 15<br>μM    | 50<br>μM    | NA  | NA                          | 18 |
| 18 |  | CH <sub>3</sub> CN<br>-H <sub>2</sub> O<br>(1:1)                        | Turn-<br>on      | 18.1 μ<br>M | 60.33<br>μM | YES | NA                          | 19 |
| 19 |  | Buffer-<br>CH <sub>3</sub> CN<br>(3:7,<br>v/v, 10<br>mM,<br>pH=7.4<br>) | Turn-<br>on      | 36 nM       | 120<br>nM   | YES | NA                          | 20 |
| 20 |  | H <sub>2</sub> O<br>(Ph 7.4)                                            | Turn-<br>off     | 0.061<br>μM | 0.2<br>μM   | YES | NA                          | 21 |
| 21 |  | DMSO-<br>Water<br>(1:99,<br>v/v,<br>HEPES<br>buffer                     | Ratio-<br>metric | 14.7<br>nM  | 49 nM       | NA  | NA                          | 22 |

|    |                                                                                     |                                                                |              |          |            |     |                      |    |
|----|-------------------------------------------------------------------------------------|----------------------------------------------------------------|--------------|----------|------------|-----|----------------------|----|
|    |                                                                                     | pH=7.2                                                         |              |          |            |     |                      |    |
| 22 | 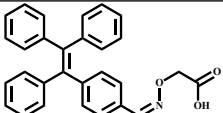   | Ethanol-water (3:7)                                            | Ratio-metric | 45.4 nM  | 151.3 3 nM | NA  | Real sample analysis | 23 |
| 23 |    | DMSO/ Tris-HCl (8:2, v/v, pH=7.0)                              | Turn-off     | 31 nM    | 103.3 3 nM | YES | Real sample analysis | 24 |
| 24 |    | HEPES buffer (20 mM, 3:7 CH <sub>3</sub> CN /H <sub>2</sub> O) | Turn-off     | 50 nM    | 166.6 7 nM | YES | Solid sensor         | 25 |
| 25 |   | Ethanol-water (6:4, v/v)                                       | Turn-off     | 17.8 nM  | 59.33 nM   | NA  | NA                   | 26 |
| 26 |  | CH <sub>3</sub> CN-H <sub>2</sub> O (5:95, v/v)                | Turn-on      | 99 ppm   | 330 ppm    | NA  | NA                   | 27 |
| 27 |  | Aqueous (1% DMSO)                                              | Turn-on      | 591.9 nM | 1.9 μM     | NA  | NA                   | 28 |
| 28 |  | MeCN-water (1 : 1, v/v)                                        | Turn-on      | 100 nM   | 0.33 μM    | NA  | NA                   | 29 |
| 29 |  | MeOH-Tris-HCl (95:5, v/v, pH=7.2)                              | Turn-off     | 7.38 nM  | 24.6 nM    | NA  | NA                   | 30 |

|    |                                                                                     |                                                |              |                    |                      |     |                       |    |
|----|-------------------------------------------------------------------------------------|------------------------------------------------|--------------|--------------------|----------------------|-----|-----------------------|----|
| 30 | 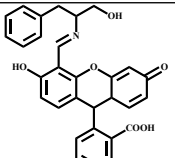   | Aqueous medium                                 | Turn-off     | 0.34 $\mu\text{M}$ | 1.13 $\mu\text{M}$   | YES | Real-time sensing     | 31 |
| 31 |    | Aqueous medium                                 | Ratio-metric | 0.138 ppm          | 0.46 ppm             | YES | Real sample analysis  | 32 |
| 32 |    | EtOH-water (5/5, v/v, HEPES pH = 7.4)          | Turn-on      | 55 nM              | 183.3 nM             | NA  | NA                    | 33 |
| 33 |    | THF-water (1 : 1, v/v)                         | Ratio-metric | 0.31 $\mu\text{M}$ | 1.03 $\mu\text{M}$   | NA  | NA                    | 34 |
| 34 |   | HEPES buffer/DMSO (v/v = 9 : 1, pH = 7.2)      | Turn-on      | 70 nM              | 0.23 $\mu\text{M}$   | NA  | biological systems    | 35 |
| 35 |  | PBS/EtOH (9 : 1, v/v) medium                   | Turn-on      | 9.1 nM             | 30.33 nM             | NA  | Real sample analysis  | 36 |
| 36 |  | HEPES buffer solution (20 mM, pH 7.4, 1% EtOH) | Turn-on      | 40 nM              | 133.3 nM             | NA  | NA                    | 37 |
| 37 |  | ACN                                            | Colorimetric | 9.22 nM            | 30.73 nM             | NA  | Multiple metal sensor | 38 |
| 38 |  | methanol-water (1 : 1) mixture                 | Colorimetric | 47 $\mu\text{M}$   | 156.66 $\mu\text{M}$ | YES | Real sample analysis  | 39 |
| 39 |  | EtOH-water (1 : 1,                             | Turn-on      | 10.3 nM            | 34.33 $\mu\text{M}$  | YES | Real sample analysis  | 40 |

|    |               |                       |                    |                    |                    |            |                                     |                      |
|----|---------------|-----------------------|--------------------|--------------------|--------------------|------------|-------------------------------------|----------------------|
|    |               | v/v)                  |                    |                    |                    |            |                                     |                      |
| 40 | <b>mHPTIL</b> | <b>100%<br/>water</b> | <b>Ratiometric</b> | <b>1.67<br/>nM</b> | <b>5.56<br/>nM</b> | <b>YES</b> | <b>Real<br/>sample<br/>analysis</b> | <b>This<br/>work</b> |

## References

- 1 K. Y. Yung, A. J. S. Hewitt, N. P. Hunter, F. V. Bright and G. A. Baker, *Chem. Commun.*, 2011, **47**, 4775–4777.
- 2 L. Zong, C. Wang, Y. Song, Y. Xie, P. Zhang, Q. Peng, Q. Li and Z. Li, *Sensors Actuators B Chem.*, 2017, **252**, 1105–1111.
- 3 J. Hu, X. Yu, X. Zhang, C. Jing, T. Liu, X. Hu, S. Lu, K. Uvdal, H. W. Gao and Z. Hu, *Spectrochim. Acta Part A Mol. Biomol. Spectrosc.*, 2020, **241**, 118657.
- 4 S. Y. Moon, N. R. Cha, Y. H. Kim and S. K. Chang, *J. Org. Chem.*, 2004, **69**, 181–183.
- 5 M. Hong, S. Lu, F. Lv and D. Xu, *Dye. Pigment.*, 2016, **127**, 94–99.
- 6 R. Singh and G. Das, *Sensors Actuators B Chem.*, 2018, **258**, 478–483.
- 7 N. Tohora, R. Sahoo, S. Ahamed, J. Chourasia, S. Lama, M. Mahato, S. Ali and S. K. Das, *Phys. Chem. Chem. Phys.*, DOI:10.1039/D4CP04660A.
- 8 M. Ozdemir, *J. Photochem. Photobiol. A Chem.*, 2016, **318**, 7–13.
- 9 Chethanakumar, M. Budri, K. B. Gudasi, R. S. Vadavi and S. S. Bhat, *J. Fluoresc.*, 2023, **33**, 539–551.
- 10 C. G. Chen, N. Vijay, N. Thirumalaivasan, S. Velmathi and S. P. Wu, *Spectrochim. Acta Part A Mol. Biomol. Spectrosc.*, 2019, **219**, 135–140.
- 11 L. Feng, W. Shi, J. Ma, Y. Chen, F. Kui, Y. Hui and Z. Xie, *Sensors Actuators B Chem.*, 2016, **237**, 563–569.
- 12 T. Sultana, M. Mahato, S. Ahamed, N. Tohora, J. Chourasia, S. Ghanta and S. Kumar Das, *J. Photochem. Photobiol. A Chem.*, 2025, **459**, 116028.

- 13 G. Yang, X. Meng, S. Fang, H. Duan, L. Wang and Z. Wang, *RSC Adv.*, 2019, **9**, 8529–8536.
- 14 E. G. C. Ergun, *New J. Chem.*, 2021, **45**, 4202–4209.
- 15 T. Rasheed, F. Nabeel, M. Bilal, Y. Zhao, M. Adeel, H. M. N. Iqbal, T. Rasheed, F. Nabeel, M. Bilal, Y. Zhao, M. Adeel and H. M. N. Iqbal, *Math. Biosci. Eng.* 2019 *41861*, 2019, **16**, 1861–1873.
- 16 H. H. Wu, Y. L. Sun, C. F. Wan, S. T. Yang, S. J. Chen, C. H. Hu and A. T. Wu, *Tetrahedron Lett.*, 2012, **53**, 1169–1172.
- 17 Y. H. Kim, S. Y. Jin, Y. M. So, J. I. Choe and S. K. Chang, *Chem. Lett.*, 2004, **33**, 702–703.
- 18 M. G. Choi, H. De Ryu, H. L. Jeon, S. Cha, J. Cho, H. H. Joo, K. S. Hong, C. Lee, S. Ann and S. K. Chang, *Org. Lett.*, 2008, **10**, 3717–3720.
- 19 A. Maity, A. Sil, S. Nad and S. K. Patra, *Sensors Actuators B Chem.*, 2018, **255**, 299–308.
- 20 C. B. Bai, P. Xu, J. Zhang, R. Qiao, M. Y. Chen, M. Y. Mei, B. Wei, C. Wang, L. Zhang and S. S. Chen, *ACS Omega*, 2019, **4**, 14621–14625.
- 21 A. Kumar, R. Ananthakrishnan, G. Jana, P. K. Chattaraj, S. Nayak and S. K. Ghosh, *ChemistrySelect*, 2019, **4**, 4810–4819.
- 22 B. Muzey and A. Naseem, *J. Photochem. Photobiol. A Chem.*, 2020, **391**, 112354.
- 23 Y. Yuan, X. Chen, Q. Chen, G. Jiang, H. Wang and J. Wang, *Anal. Biochem.*, 2019, **585**, 113403.
- 24 Y. Li, W. Shi, J. Ma, X. Wang, X. Kong, Y. Zhang, L. Feng, Y. Hui and Z. Xie, *J. Photochem. Photobiol. A Chem.*, 2017, **338**, 1–7.
- 25 Shaily, A. Kumar and N. Ahmed, *Ind. Eng. Chem. Res.*, 2017, **56**, 6358–6368.
- 26 K. M. Vengaiyan, C. D. Britto, K. Sekar, G. Sivaraman and S. Singaravadivel, *Sensors*



- Actuators B Chem.*, 2016, **235**, 232–240.
- 27 M. Lo Presti, R. Martínez-Mañez, J. V. Ros-Lis, R. M. F. Batista, S. P. G. Costa, M. M. Raposo and F. Sancenón, *New J. Chem.*, 2018, **42**, 7863–7868.
  - 28 R. X. Zhang, P. F. Li, W. J. Zhang, N. Li and N. Zhao, *J. Mater. Chem. C*, 2016, **4**, 10479–10485.
  - 29 G. Singh, S. I. Reja, V. Bhalla, D. Kaur, P. Kaur, S. Arora and M. Kumar, *Sensors Actuators B Chem.*, 2017, **249**, 311–320.
  - 30 P. Piyanuch, S. Watpathomsub, V. S. Lee, H. A. Nienaber and N. Wanichacheva, *Sensors Actuators B Chem.*, 2016, **224**, 201–208.
  - 31 R. V. Rathod, S. Bera, P. Maity and D. Mondal, *ACS Omega*, 2020, **5**, 4982–4990.
  - 32 J. Wang, Q. Rao, H. Wang, Q. Zhang, G. Liu, Z. Wu, J. Yu, X. Zhu, Y. Tian and H. Zhou, *Anal. Methods*, 2019, **11**, 227–231.
  - 33 J. Xu, Z. Xu, Z. Wang, C. Liu, B. Zhu, X. Wang, K. Wang, J. Wang and G. Sang, *Luminescence*, 2018, **33**, 219–224.
  - 34 T. Leng, Y. Ma and G. Chen, *J. Photochem. Photobiol. A Chem.*, 2018, **353**, 143–149.
  - 35 Y. Gao, C. Zhang, S. Peng and H. Chen, *Sensors Actuators B Chem.*, 2017, **238**, 455–461.
  - 36 Y. Li, S. Qi, C. Xia, Y. Xu, G. Duan and Y. Ge, *Anal. Chim. Acta*, 2019, **1077**, 243–248.
  - 37 A. Picard-Lafond, D. Larivière and D. Boudreau, *ACS Omega*, 2020, **5**, 701–711.
  - 38 X. Cao, Y. Li, Y. Yu, S. Fu, A. Gao and X. Chang, *Nanoscale*, 2019, **11**, 10911–10920.
  - 39 T. Anand and S. K. Sahoo, *Phys. Chem. Chem. Phys.*, 2019, **21**, 11839–11845.
  - 40 L. Lan, Q. Niu and T. Li, *Anal. Chim. Acta*, 2018, **1023**, 105–114.
